# Supplementary material
Source: PubMed Central journal article supplement (PMC6187839)
Supplement: sxd-0006-0169-s01.pdf [file sxd-0006-0169-s01.pdf]

# Figure S1

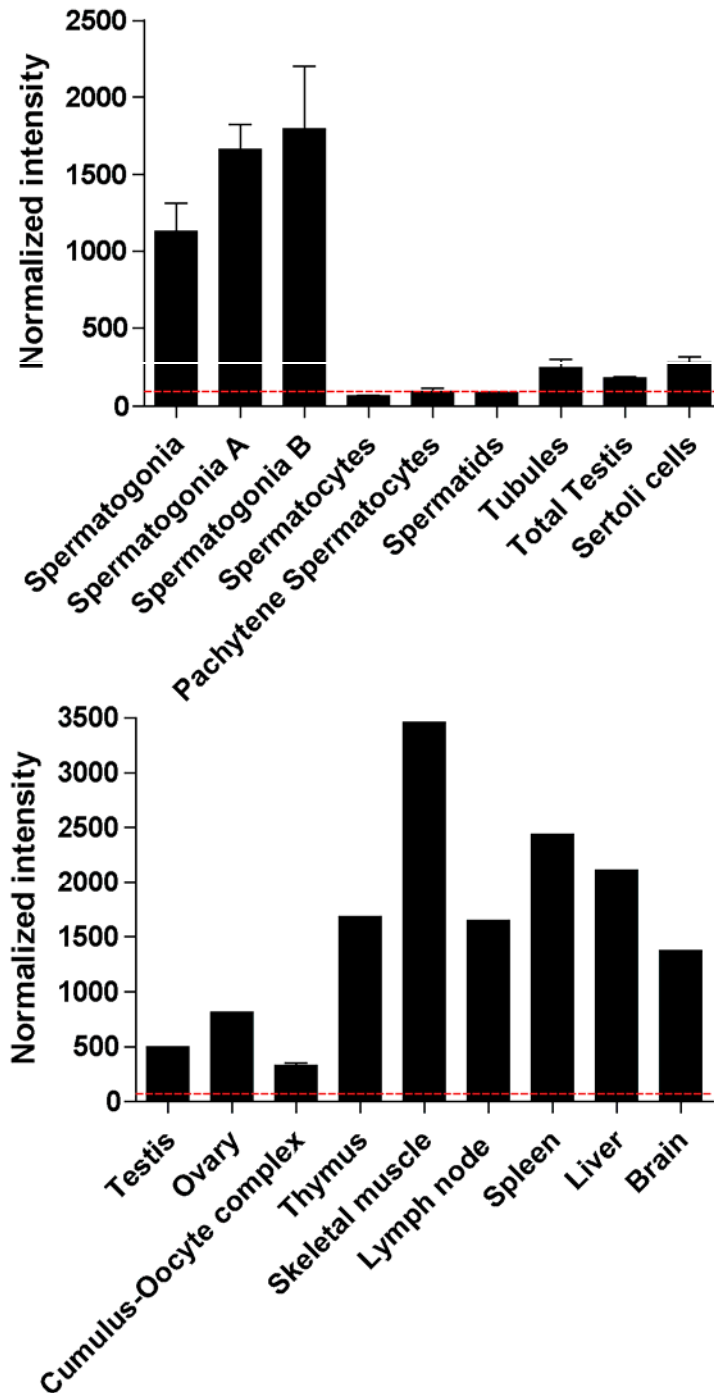

**Fig. S1. Levels of *Gilz* transcripts present in male germ cells, Sertoli cells, testis and other tissues determined by Affymetrix microarray analysis.** Expression profiles for the transcript *Tsc22d3* (*Gilz*, probeset 1420772) were determined by microarrays as determined by Chalmel et al. [2007] and Lardenois et al. [2010]. The expression data were extracted from the website [www.germonline.org](http://www.germonline.org). Note in testis the high levels of *Tsc22d3* transcripts in spermatogonia. The red dash line represents the normalized median intensity of the samples, a value that is commonly assimilated to the background level.

## Figure S2

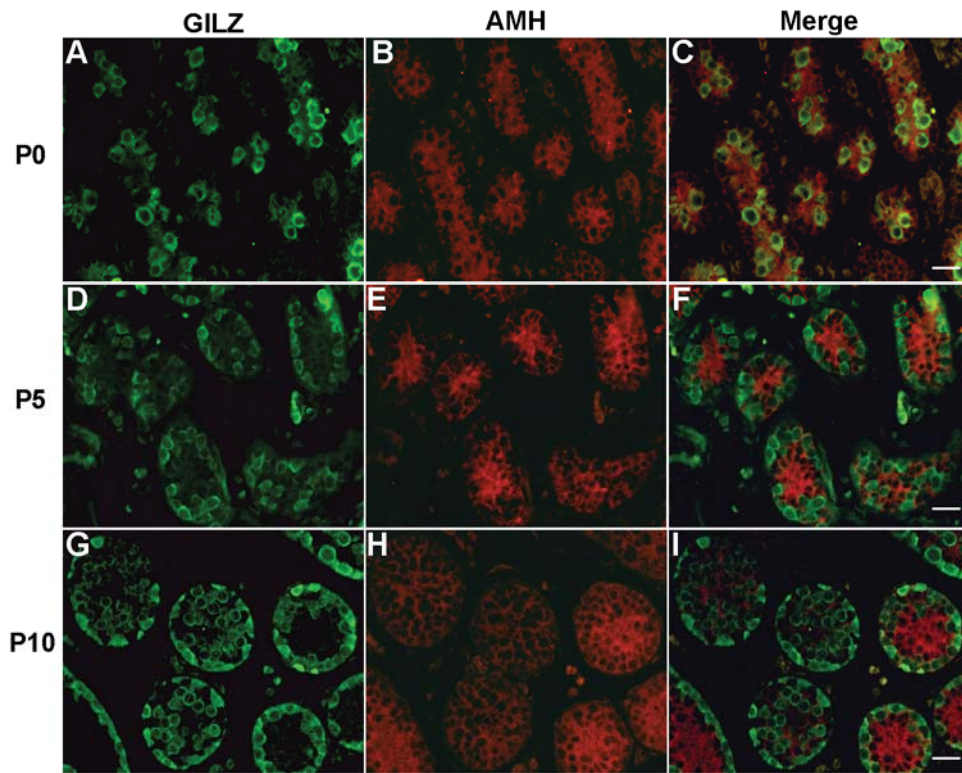

**Fig. S2. GILZ is not expressed in Sertoli cells.** Double immunolabelling for GILZ (green, **A, D, G**) and the Sertoli cell marker AMH (red, **B, E, H**) in the testis at P0 (**A–C**), P5 (**D–F**) and P10 (**G–I**). A merged image of green and red is shown in the right panel (**C, F, I**). GILZ is present at the vicinity of the germ cell nucleus but not present in the Sertoli cell. Scale bars = 20 μm.

Figure S3

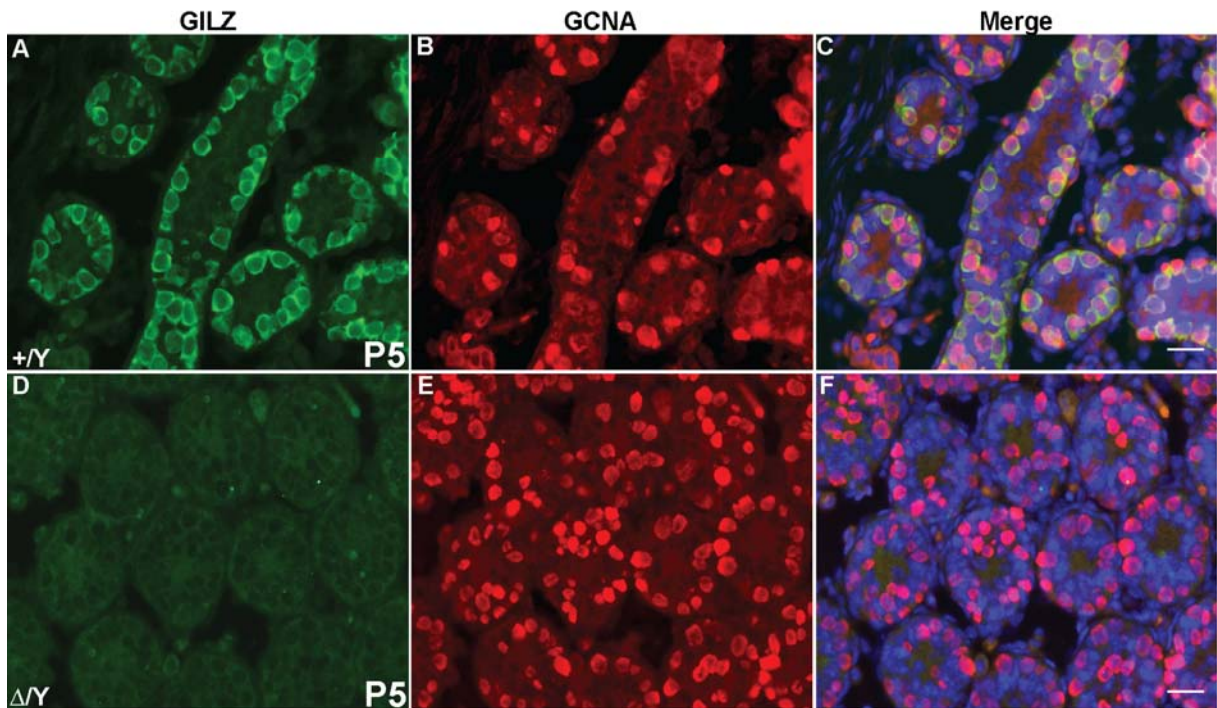

**Fig. S3. GILZ is absent in *Gilz* <sup>$\Delta/y$</sup>  mutant testes.** Double immunolabelling for GILZ (green, **A**, **D**) and the germ cell marker GCNA (red, **B**, **E**) in control and mutant testes at P5. A merged image of green and red is shown in the right panel (**C**, **F**). Note the complete absence of GILZ protein in mutant individuals ( $\Delta/Y$ ). Scale bars = 20  $\mu$ m.

## Figure S4

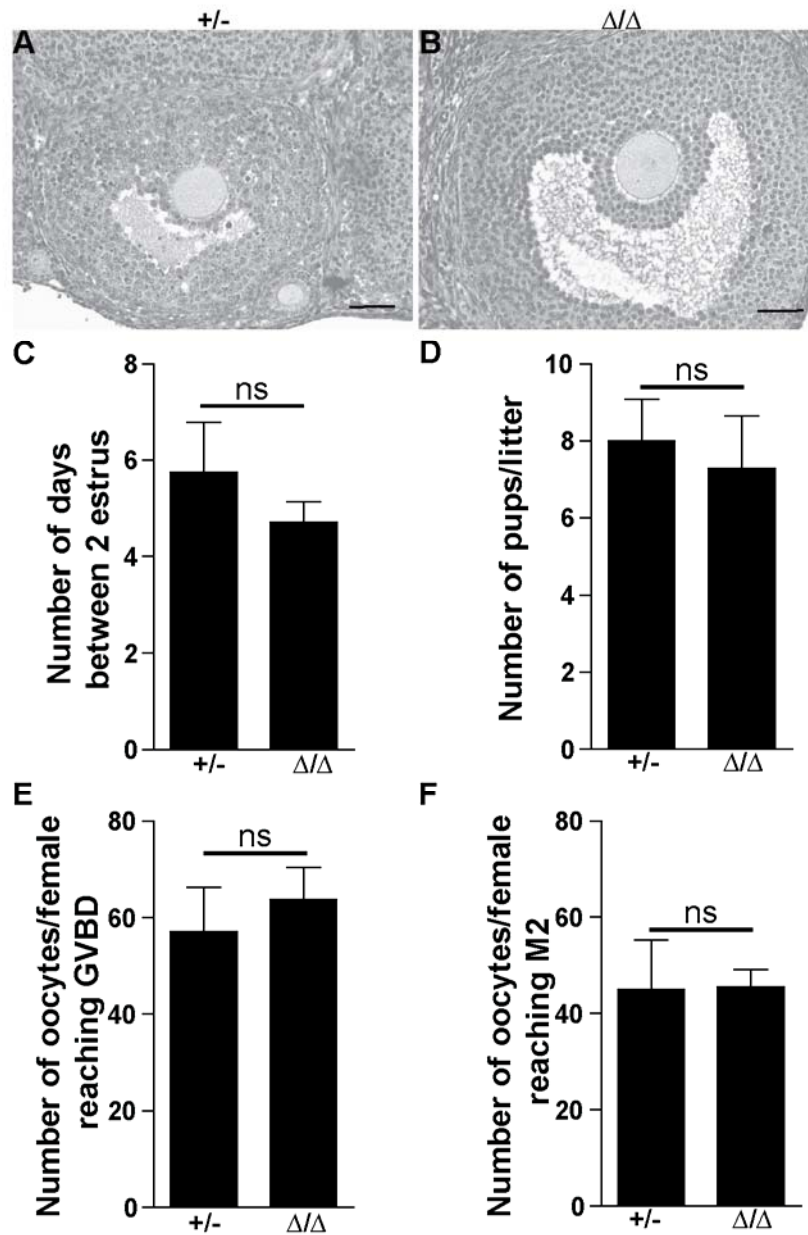

**Fig. S4. Absence of reproductive defects in female mice lacking *Gilz*.** Histological sections show control (A, +/-) and *Gilz* mutant (B,  $\Delta/\Delta$ ) tertiary oocytes. Oestrous cyclicity assessments show no differences between control and mutant individuals (C). Fertility tests demonstrate that the number of pups produced by either control or mutant female individuals is similar (D). The number of maturing oocytes into GVBD (Germinal Vesicle Break-Down) and M2 (Metaphase II) is similar between control and mutant females (E, F). Results are mean  $\pm$  SEM, n = 3–4, ns = not significant. Scale bars = 50  $\mu\text{m}$ .

Figure S5

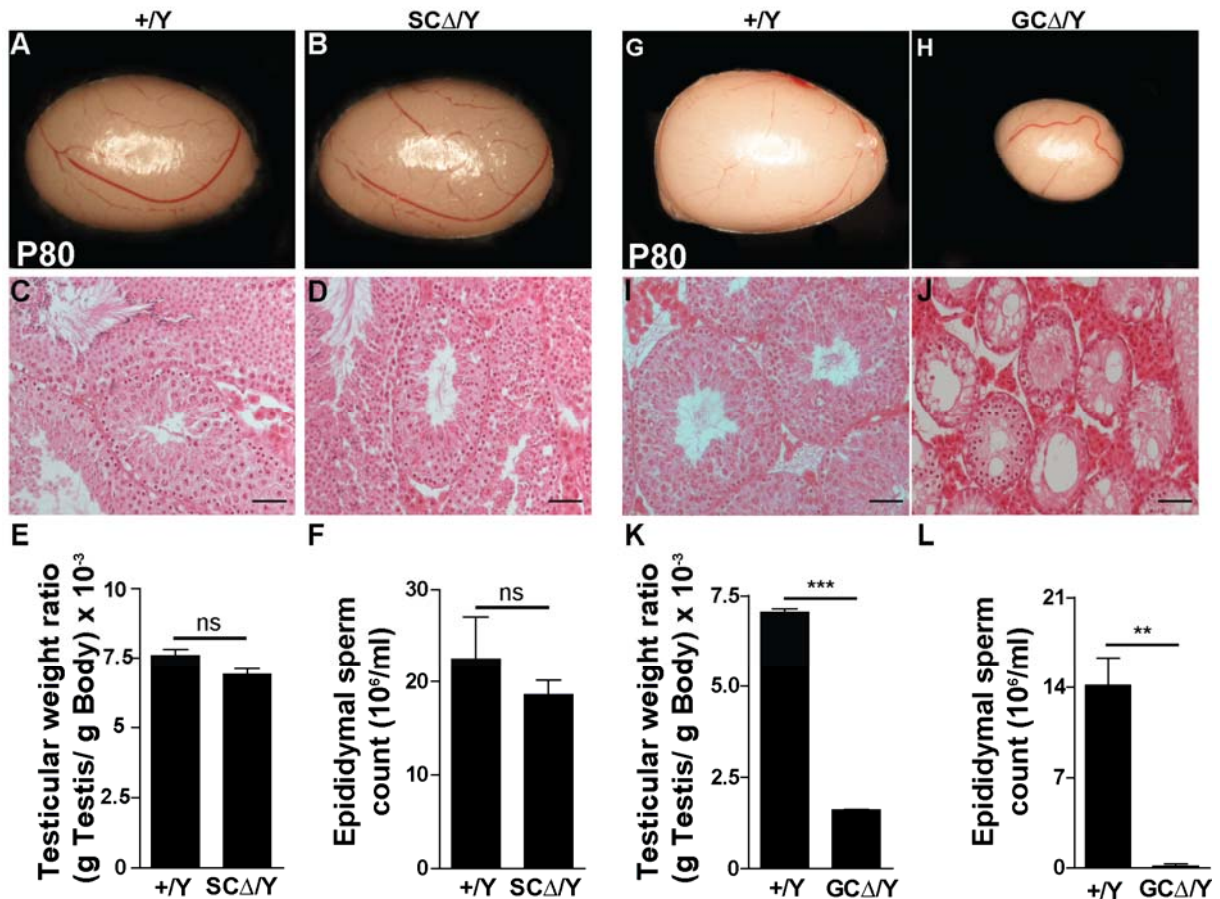

**Fig. S5. Specific depletion of *Gilz* in Sertoli and germ cells.** A–F Testicular function is not affected when *Gilz* is specifically deleted in Sertoli cells. Testis parameters comparison between control (*Gilz*<sup>fx/Y</sup>, abbreviated +/Y, n = 4) and Sertoli-specific mutant (*Amh:Cre;Gilz*<sup>fx/Y</sup> abbreviated SCΔ/Y, n = 9) animals revealed no differences in global testis morphology (A, B), histology (C, D), testicular weight (E) and epididymal sperm count (F). G–L Specific ablation of *Gilz* in germ cells recapitulates the reproductive phenotype observed in the constitutive mutant (*Gilz*<sup>Δ/y</sup>). Similarly to *Gilz*<sup>Δ/y</sup> testes, adult testis from *Ddx4:Cre;Gilz*<sup>fx/Y</sup> (abbreviated GCΔ/Y, n = 3; H) mice exhibited a 80% reduction (K) in weight compared to control *Gilz*<sup>fx/Y</sup> individuals (abbreviated +/Y, n = 6; G). H&E staining of testis sections (I, J) revealed complete absence of mature spermatozoa and elongated spermatids in GCΔ/Y testes. L Epididymal sperm count analysis shows a ~100% decrease in GCΔ/Y mutants. Results are mean ± SEM, ns = not significant, \*\* p < 0.01, \*\*\* p < 0.001 versus controls. Scale bars = 50 μm.

## Figure S6

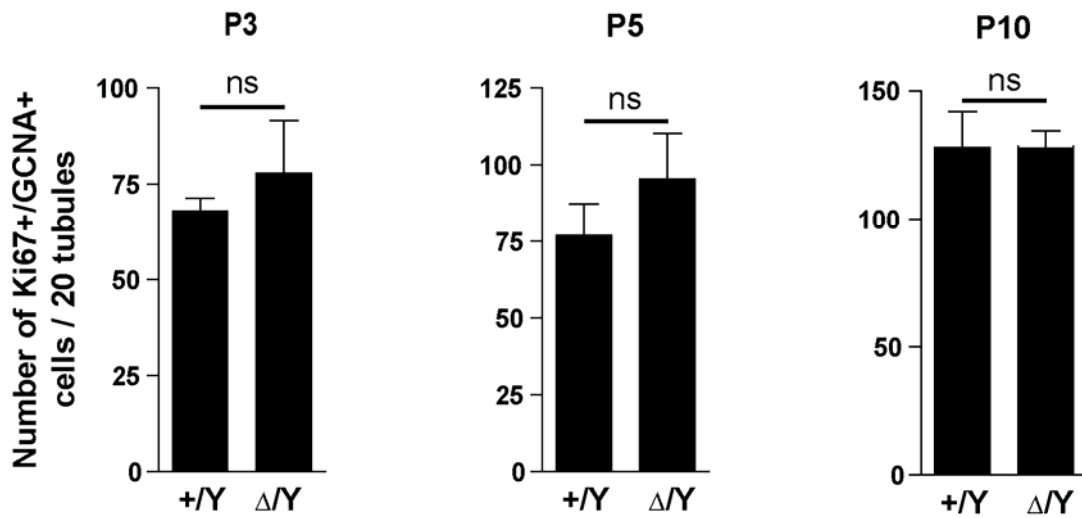

**Fig. S6. Spermatogonial proliferation is not affected in P3, P5 and P10 *Gilz*<sup>Δ/y</sup> mutant testes.** Graphs showing count of double-positive cells for both GCNA and Ki-67-specific markers. Cell counts were performed on paraffin-embedded sections at P3, P5 and P10. No differences were observed between control (+/Y) and mutant (Δ/Y) individuals. Results are mean ± SEM, ns = not significant.
